# Supplementary material for: Nitrogen Fertilization, Stand Age, and Overstory Tree Species Impact the Herbaceous Layer in a Central Appalachian Hardwood Forest
Source: MDPI journal article supplement (doi:10.3390/f12070829), 2021-06-24
Supplement: s1 [file s1]

# Supplemental Tables and Figures

Table S1. Species found in each sampling campaign (Su – summer, Sp – spring) in studied watersheds (WS3, WS7, WS10, WS13) at the Fernow Experimental Forest, West Virginia, USA. Numbers represent the count of plots (out of 72 possible) in which the species were present. \*parasitic herb, #non-native, \$annual species, (\$§)annual or perennial species.

| Species                            | Authority            | Common name              | Su<br>2018 | Sp<br>2019 | Su<br>2019 |
|------------------------------------|----------------------|--------------------------|------------|------------|------------|
| <b>Tree seedlings</b>              |                      |                          |            |            |            |
| <i>Acer pensylvanicum</i>          | L.                   | Striped maple            | 47         | 42         | 33         |
| <i>Acer rubrum</i>                 | L.                   | Red maple                | 63         | 57         | 64         |
| <i>Acer saccharinum</i>            | L.                   | Silver maple             | 1          | 1          |            |
| <i>Acer saccharum</i>              | Marsh.               | Sugar maple              | 19         | 17         | 22         |
| <i>Betula lenta</i>                | L.                   | Black birch              | 10         | 6          | 9          |
| <i>Carya cordiformis</i>           | Wang.                | Bitternut hickory        | 1          | 2          | 3          |
| <i>Castanea dentata</i>            | Marsh.               | Chestnut                 | 2          | 1          | 5          |
| <i>Fagus grandifolia</i>           | Ehrh.                | American beech           | 3          | 4          | 1          |
| <i>Fraxinus americana</i>          | L.                   | White ash                | 18         | 18         | 17         |
| <i>Ilex montana</i>                | Torr. & Gray ex Gray | Mountain holly           | 2          | 2          | 2          |
| <i>Liriodendron tulipifera</i>     | L.                   | Tulip-poplar             | 13         | 42         | 12         |
| <i>Magnolia acuminata</i>          | L.                   | Cucumber magnolia        | 18         | 13         | 19         |
| <i>Magnolia fraseri</i>            | Walt.                | Mountain magnolia        | 2          | 3          | 3          |
| <i>Nyssa sylvatica</i>             | Marsh.               | Blackgum                 | 1          | 6          |            |
| <i>Ostrya virginiana</i>           | Mill.                | Ironwood                 | 9          | 9          |            |
| <i>Prunus serotina</i>             | Ehrh.                | Wild black cherry        | 41         | 37         | 43         |
| <i>Quercus alba</i>                | L.                   | White oak                | 4          | 1          |            |
| <i>Quercus montana</i>             | Willd.               | Chestnut oak             | 3          | 2          |            |
| <i>Quercus rubra</i>               | L.                   | Red oak                  | 32         | 31         | 32         |
| <i>Quercus velutina</i>            | Lam.                 | Black oak                |            | 1          |            |
| <i>Robinia pseudoacacia</i>        | L.                   | Black locust             |            | 1          |            |
| <i>Sassafras albidum</i>           | Nutt.                | Sassafras                | 3          | 9          | 1          |
| <i>Ulmus rubra</i>                 | Muhl.                | Slippery elm             |            |            | 5          |
| <b>Shrubs/Vines</b>                |                      |                          |            |            |            |
| <i>Berberis thunbergii</i> #       | DC.                  | Japanese barberry        |            |            | 2          |
| <i>Cornus alternifolia</i>         | L. f.                | Alternate-leaved dogwood | 2          | 2          | 1          |
| <i>Dioscorea quaternata</i>        | Walt. J.F. Gmel.     | Four-leaved wild yam     | 21         | 11         | 11         |
| <i>Hamamelis virginiana</i>        | L.                   | Witch-hazel              | 4          | 3          | 3          |
| <i>Kalmia latifolia</i>            | L.                   | Mountain laurel          | 1          | 1          | 1          |
| <i>Lindera benzoin</i>             | L.                   | Spicebush                | 3          |            |            |
| <i>Menziesia pilosa</i>            | Michx. ex Lam        | Minnie-bush              | 3          | 3          | 3          |
| <i>Parthenocissus quinquefolia</i> | L.                   | Virginia creeper         | 1          | 1          | 1          |
| <i>Rhododendron calendulaceum</i>  | Michx.               | Flame azalea             | 3          |            |            |
| <i>Rosa multiflora</i> #           | Thunb. ex Murr.      | Multiflora rose          | 2          | 2          | 4          |
| <i>Rubus</i> spp.                  | L.                   | Blackberry               | 48         | 49         | 51         |
| <i>Sambucus</i> spp.               | L.                   | Elderberry               | 1          |            |            |
| <i>Smilax rotundifolia</i>         | L.                   | Common greenbrier        | 50         | 51         | 47         |
| <i>Vaccinium pallidum</i>          | Ait.                 | Upland low blueberry     | 4          | 3          | 3          |
| <i>Viburnum acerifolium</i>        | L.                   | Maple-leaf viburnum      | 6          | 6          | 6          |
| <i>Vitis</i> spp.                  | L.                   | Grape                    |            | 3          |            |

Table S1 continued.

| Species                                     | Authority       | Common name                   | Su<br>2018 | Sp<br>2019 | Su<br>2019 |
|---------------------------------------------|-----------------|-------------------------------|------------|------------|------------|
| Herbs                                       |                 |                               |            |            |            |
| <i>Actaea racemosa</i>                      | L.              | Black cohosh                  | 1          | 1          |            |
| <i>Anemone</i> spp.                         | L.              | Anemone                       | 6          | 8          | 8          |
| <i>Arisaema triphyllum</i>                  | L.              | Jack-in-the-pulpit            | 13         | 10         | 5          |
| <i>Asarum canadense</i>                     | L.              | Wild ginger                   |            |            | 1          |
| <i>Boehmeria cylindrica</i>                 | L.              | False nettle                  |            | 4          |            |
| <i>Conopholis americana</i> *               | L.              | Cancerroot                    | 2          |            | 1          |
| <i>Cypripedium acaule</i>                   | Ait.            | Pink lady's slipper           | 3          | 3          | 2          |
| <i>Epifagus virginiana</i> *                | L.              | Beechdrops                    |            | 1          | 1          |
| <i>Eurybia divaricata</i>                   | L.              | White wood aster              | 19         | 16         | 14         |
| <i>Galium aparine</i> <sup>s</sup>          | L.              | Common bedstraw               |            | 5          |            |
| <i>Galium asprellum</i>                     | Michx.          | Rough bedstraw                | 1          |            | 5          |
| <i>Galium lanceolatum</i>                   | Torr.           | Lanceleaf wild liquorice      | 2          |            |            |
| <i>Galium triflorum</i>                     | Michx.          | Sweet-scented bedstraw        | 1          |            |            |
| <i>Gaultheria procumbens</i>                | L.              | Teaberry                      |            | 1          |            |
| <i>Goodyera pubescens</i>                   | Willd.          | Downy rattlesnake<br>plantain | 3          | 3          | 3          |
| <i>Laportea canadensis</i>                  | L.              | Wood nettle                   | 8          | 5          | 10         |
| <i>Maianthemum racemosum</i>                | L.              | False Solomon's seal          | 1          | 2          |            |
| <i>Medeola virginiana</i>                   | L.              | Indian cucumber root          | 19         | 19         | 20         |
| <i>Mitchella repens</i>                     | L.              | Partridge berry               | 3          | 3          | 3          |
| <i>Monotropa uniflora</i> *                 | L.              | Indian pipe                   | 1          |            |            |
| <i>Osmorhiza claytonii</i>                  | Michx.          | Hairy sweet cicely            | 5          | 5          | 4          |
| <i>Polygonatum biflorum</i>                 | Walt.           | Great Solomon's seal          | 8          | 11         | 21         |
| <i>Polygonum virginianum</i> <sup>(s)</sup> | L.              | Virginia knotweed             | 8          | 8          | 8          |
| <i>Prenanthes altissima</i>                 | L.              | Tall white lettuce            |            | 4          | 3          |
| <i>Prosartes lanuginosa</i>                 | Michx.          | Yellow fairybells             | 29         | 25         | 27         |
| <i>Smilax herbacea</i>                      | L.              | Carrion flower                | 4          | 12         | 18         |
| <i>Stellaria pubera</i>                     | Michx.          | Great chickweed               | 34         | 37         | 37         |
| <i>Trillium erectum</i>                     | L.              | Ill-scented trillium          |            | 3          |            |
| <i>Trillium</i> spp.                        | L.              | Trillium                      | 2          |            | 2          |
| <i>Uvularia perfoliata</i>                  | L.              | Mealy bellwort                |            | 8          | 12         |
| <i>Uvularia sessilifolia</i>                | L.              | Sessile-leaved bellwort       |            | 1          |            |
| <i>Viola</i> spp.                           | L.              | Violet                        | 56         | 61         | 62         |
| Graminoids                                  |                 | Grasses and sedges            | 8          | 10         | 13         |
| Ferns                                       |                 |                               |            |            |            |
| <i>Athyrium filix-femina</i>                | L.              | Lady fern                     | 5          | 2          | 2          |
| <i>Dennstaedtia punctilobula</i>            | Michx.          | Hay-scented fern              | 24         | 23         | 27         |
| <i>Dryopteris intermedia</i>                | Muhl. Ex Willd. | Intermediate shield fern      | 25         | 27         | 23         |
| <i>Polystichum acrostichoides</i>           | Michx.          | Christmas fern                | 30         | 31         | 29         |
| <i>Thelypteris noveboracensis</i>           | L.              | New York Fern                 | 19         | 20         | 17         |

Table S2. Proportion of the total number of species in different plant types at the watershed (WS) level at the Fernow Experimental Forest, West Virginia, USA.

|                          | WS3  | WS7  | WS13 | WS10 | Avg  |
|--------------------------|------|------|------|------|------|
| Relative species numbers |      |      |      |      |      |
| Ferns                    | 16.7 | 10.2 | 7.0  | 11.1 | 11.2 |
| Herbs                    | 33.3 | 44.9 | 34.9 | 38.9 | 38.0 |
| Shrubs/vines             | 16.7 | 14.3 | 20.9 | 11.1 | 15.7 |
| Tree seedlings           | 33.3 | 30.6 | 37.2 | 38.9 | 35.0 |

Table S3a. Results of the statistical analyses (repeated measures ANOVA) of differences in herb-layer indices between watersheds (WS) at the Fernow Experimental Forest, West Virginia, USA, in the **summers of 2018 and 2019**. P-values are shown for full and reduced models. The final models selected for this study have the lower AIC value (shown in bold) in the comparison between full and reduced model. Continuous predictor variables are explained in Figure 7. Bold font -  $P \leq 0.1$ , underlined bold font -  $P \leq 0.05$ ; blue- negative correlation, pink- positive correlation.

|                     |     | Cover      |               | Richness, S |               | Diversity, H |               | Evenness, J |               |
|---------------------|-----|------------|---------------|-------------|---------------|--------------|---------------|-------------|---------------|
|                     |     | Full model | Reduced model | Full model  | Reduced model | Full model   | Reduced model | Full model  | Reduced model |
| WS3 vs WS7          |     |            |               |             |               |              |               |             |               |
|                     | AIC | 505        | 525           | 324         | 317           | 76.5         | 43            | -34         | -81           |
| Watershed (WS)      |     | 0.57       | 0.98          | <.0001      | <.0001        | 0.001        | <.0001        | 0.11        | 0.02          |
| Maple (M)           |     | 0.69       | 0.33          | 0.89        | 0.88          | 0.99         | 0.91          | 0.80        | 0.59          |
| WS × M              |     | 0.12       | 0.03          | 0.01        | 0.001         | 0.19         | 0.09          | 0.99        | 0.90          |
| Slope               |     | 1.00       |               | 0.03        | 0.01          | 0.01         | 0.004         | 0.04        | 0.03          |
| Aspect code         |     | 0.76       |               | 0.14        | 0.04          | 0.10         | 0.02          | 0.15        | 0.02          |
| Distance to stream  |     | 0.43       |               | 0.05        | 0.01          | 0.03         | 0.01          | 0.09        | 0.05          |
| DBH                 |     | 0.85       |               | 0.68        |               | 0.40         | 0.32          | 0.15        | 0.07          |
| Large neighbor DBH  |     | 0.05       | 0.02          | 0.84        |               | 0.89         |               | 0.73        |               |
| Canopy cover        |     | 0.13       | 0.06          | 0.51        |               | 0.20         | 0.15          | 0.03        | 0.02          |
| Large neighbor myc. |     | 0.44       |               | 0.86        |               | 0.96         |               | 0.87        |               |
| Leaf area index     |     | 0.08       | 0.05          | 0.44        |               | 0.61         |               | 0.77        |               |
| BA of ECM trees     |     | 0.36       | 0.85          | 0.38        | 0.05          | 0.68         |               | 1.00        |               |
| BA of AM trees      |     | 0.15       | 0.02          | 0.62        |               | 0.64         |               | 0.72        |               |
| WS7 vs WS13         |     |            |               |             |               |              |               |             |               |
|                     | AIC | 472        | 475           | 344         | 347           | 76           | 62            | -29         | -70           |
| Watershed (WS)      |     | 0.01       | <.0001        | 0.33        | 0.35          | 0.06         | 0.01          | 0.04        | 0.02          |
| Maple (M)           |     | 0.42       | 0.60          | 0.67        | 0.45          | 0.57         | 0.68          | 0.27        | 0.31          |
| WS × M              |     | 0.07       | 0.02          | 0.29        | 0.22          | 0.77         | 0.83          | 0.70        | 0.56          |
| Slope               |     | 0.71       |               | 0.15        | 0.09          | 0.40         | 0.30          | 0.98        |               |
| Aspect code         |     | 0.51       |               | 0.18        | 0.08          | 0.90         |               | 0.35        | 0.14          |
| Distance to stream  |     | 0.58       |               | 0.95        |               | 0.76         |               | 0.53        |               |
| DBH                 |     | 0.62       |               | 0.33        | 0.31          | 0.14         | 0.09          | 0.10        | 0.101         |
| Large neighbor DBH  |     | 0.91       |               | 0.26        | 0.12          | 0.16         | 0.10          | 0.27        | 0.63          |
| Canopy cover        |     | 0.46       |               | 0.08        | 0.03          | 0.51         |               | 0.87        |               |
| Large neighbor myc. |     | 0.31       | 0.26          | 0.97        |               | 0.86         |               | 0.83        |               |
| Leaf area index     |     | 0.22       | 0.31          | 0.26        | 0.17          | 0.69         |               | 0.14        | 0.07          |
| BA of ECM trees     |     | 0.40       | 0.13          | 0.26        | 0.10          | 0.26         | 0.10          | 0.49        |               |
| BA of AM trees      |     | 0.99       |               | 0.62        |               | 0.15         | 0.09          | 0.12        | 0.26          |
| WS10 vs WS13        |     |            |               |             |               |              |               |             |               |
|                     | AIC | 470        | 462           | 338         | 329           | 84           | 55            | -28         | -56           |
| Watershed (WS)      |     | 0.56       | 0.22          | 0.58        | 0.62          | 0.17         | 0.20          | 0.12        | 0.08          |
| Maple (M)           |     | 0.35       | 0.18          | 0.30        | 0.13          | 0.46         | 0.32          | 0.70        | 0.47          |
| WS × M              |     | 0.20       | 0.10          | 0.72        | 0.48          | 0.42         | 0.47          | 0.14        | 0.09          |
| Slope               |     | 0.81       |               | 0.91        |               | 0.33         | 0.33          | 0.15        | 0.13          |
| Aspect code         |     | 0.15       | 0.09          | 0.85        |               | 0.15         | 0.11          | 0.02        | 0.01          |
| Distance to stream  |     | 0.31       | 0.19          | 0.93        |               | 0.20         | 0.29          | 0.05        | 0.03          |
| DBH                 |     | 0.67       |               | 0.47        | 0.28          | 0.14         | 0.09          | 0.05        | 0.03          |
| Large neighbor DBH  |     | 0.66       |               | 0.67        |               | 0.62         |               | 0.71        |               |
| Canopy cover        |     | 0.30       | 0.40          | 0.70        |               | 0.42         | 0.20          | 0.14        | 0.13          |
| Large neighbor myc. |     | 0.32       | 0.64          | 0.95        |               | 0.56         |               | 0.35        | 0.24          |
| Leaf area index     |     | 0.56       |               | 0.29        | 0.40          | 0.78         |               | 0.66        |               |
| BA of ECM trees     |     | 0.51       |               | 0.59        |               | 0.70         |               | 0.89        | 0.49          |
| BA of AM trees      |     | 0.63       |               | 0.62        |               | 0.73         |               | 0.41        |               |

Table S3b. Results of the statistical analyses (repeated measures ANOVA) of differences in herb-layer indices between watersheds (WS) at the Fernow Experimental Forest, West Virginia, USA, in the **spring of 2019**. P-values are shown for full and reduced models. The final models selected for this study have the lower AIC value (shown in bold) in the comparison between full and reduced model. Continuous predictor variables are explained in Figure 7. Bold font  $P \leq 0.1$ , underlined bold font  $P \leq 0.05$ ; blue- negative correlation, pink- positive correlation

|                     |                    | Cover               |                     | Richness, S         |                    | Diversity, H        |                    | Evenness, J        |               |
|---------------------|--------------------|---------------------|---------------------|---------------------|--------------------|---------------------|--------------------|--------------------|---------------|
|                     |                    | Full model          | Reduced model       | Full model          | Reduced model      | Full model          | Reduced model      | Full model         | Reduced model |
| <b>WS3 vs WS7</b>   |                    |                     |                     |                     |                    |                     |                    |                    |               |
|                     | <b>AIC</b>         | 195                 | <b>190</b>          | 178                 | <b>171</b>         | 87                  | <b>58</b>          | 40                 | <b>-0.9</b>   |
| Watershed (WS)      | <u><b>0.01</b></u> | <u><b>0.01</b></u>  | <u><b>0.004</b></u> | <u><b>0.001</b></u> | <u><b>0.02</b></u> | <u><b>0.001</b></u> | 0.40               | 0.31               |               |
| Maple (M)           | 0.76               | 0.76                | 0.27                | 0.33                | 0.54               | 0.37                | 0.88               | 0.81               |               |
| WS × M              | 0.66               | 0.67                | 0.59                | 0.48                | 0.55               | 0.52                | 0.84               | 0.82               |               |
| Slope               | <b>0.07</b>        | <b>0.06</b>         | <b>0.11</b>         | <u><b>0.02</b></u>  | <b>0.03</b>        | <b>0.03</b>         | 0.12               | <b>0.08</b>        |               |
| Aspect code         | 0.28               | 0.26                | 0.40                | 0.65                | 0.20               | <u><b>0.04</b></u>  | 0.44               | 0.35               |               |
| Distance to stream  | <u><b>0.02</b></u> | <u><b>0.01</b></u>  | <u><b>0.02</b></u>  | <u><b>0.00</b></u>  | <b>0.10</b>        | <u><b>0.04</b></u>  | 0.76               |                    |               |
| DBH                 | 0.91               |                     | 0.53                |                     | 0.34               | 0.25                | 0.49               |                    |               |
| Large neighbor DBH  | 0.42               | 0.35                | 0.96                |                     | 0.75               |                     | 0.46               |                    |               |
| Canopy cover        | 0.17               | 0.14                | 0.40                | 0.38                | <b>0.05</b>        | <u><b>0.04</b></u>  | <u><b>0.03</b></u> | <u><b>0.04</b></u> |               |
| Large neighbor myc. | 0.20               | 0.09                | 0.96                |                     | 0.60               |                     | 0.37               | 0.17               |               |
| Leaf area index     | <b>0.04</b>        | <b>0.03</b>         | 0.13                | <b>0.03</b>         | 0.57               |                     | 0.67               |                    |               |
| BA of ECM trees     | 0.92               |                     | 0.63                |                     | 0.60               |                     | 0.75               |                    |               |
| BA of AM trees      | 0.27               | 0.20                | 0.84                |                     | 0.53               |                     | 0.21               | <b>0.08</b>        |               |
| <b>WS7 vs WS13</b>  |                    |                     |                     |                     |                    |                     |                    |                    |               |
|                     | <b>AIC</b>         | <b>207</b>          | 208                 | <b>189</b>          | 200                | 93                  | <b>62</b>          | 43                 | <b>-6.2</b>   |
| Watershed (WS)      | 0.22               | <u><b>0.003</b></u> | 0.21                | <u><b>0.02</b></u>  | <b>0.11</b>        | <u><b>0.004</b></u> | 0.19               | 0.11               |               |
| Maple (M)           | 0.11               | <b>0.09</b>         | 0.55                | 0.27                | 0.41               | 0.25                | 0.44               | 0.27               |               |
| WS × M              | 0.59               | 0.44                | 0.12                | <u><b>0.05</b></u>  | 0.21               | <b>0.08</b>         | 0.61               | 0.23               |               |
| Slope               | 0.45               |                     | 0.43                | 0.64                | 0.68               |                     | 0.76               |                    |               |
| Aspect code         | 0.35               | 0.66                | 0.63                |                     | 0.70               |                     | 0.86               |                    |               |
| Distance to stream  | 0.85               |                     | 0.60                |                     | 0.64               |                     | 0.96               |                    |               |
| DBH                 | 0.20               | <u><b>0.05</b></u>  | 0.45                | 0.29                | 0.78               |                     | 0.39               | 0.19               |               |
| Large neighbor DBH  | 0.95               |                     | 0.35                | 0.38                | 0.24               | 0.11                | 0.42               | 0.83               |               |
| Canopy cover        | 0.74               |                     | 0.64                |                     | 0.89               |                     | 0.99               |                    |               |
| Large neighbor myc. | 0.75               |                     | 0.85                |                     | 0.90               |                     | 0.76               |                    |               |
| Leaf area index     | 0.43               | 0.52                | 0.53                |                     | 0.74               |                     | 0.91               |                    |               |
| BA of ECM trees     | 0.81               |                     | 0.58                |                     | 0.22               | <b>0.10</b>         | 0.25               | 0.34               |               |
| BA of AM trees      | 0.82               |                     | 0.40                | 0.57                | 0.35               | 0.11                | 0.59               |                    |               |
| <b>WS10 vs WS13</b> |                    |                     |                     |                     |                    |                     |                    |                    |               |
|                     | <b>AIC</b>         | 209                 | <b>206</b>          | 195                 | <b>187</b>         | 100                 | <b>66.5</b>        | 47                 | <b>23.4</b>   |
| Watershed (WS)      | 0.57               | 0.51                | 0.99                | 0.90                | 0.49               | 0.62                | 0.22               | 0.13               |               |
| Maple (M)           | 0.19               | 0.11                | 0.26                | <b>0.08</b>         | 0.36               | 0.18                | 0.52               | 0.52               |               |
| WS × M              | 0.31               | 0.24                | 0.32                | 0.16                | 0.35               | 0.18                | 0.69               | 0.67               |               |
| Slope               | 0.88               |                     | 0.68                |                     | 0.22               | 0.16                | 0.20               | 0.22               |               |
| Aspect code         | 0.20               | 0.13                | 0.87                |                     | 0.31               | 0.34                | <b>0.07</b>        | <u><b>0.05</b></u> |               |
| Distance to stream  | 0.32               | 0.19                | 0.67                |                     | 0.61               |                     | 0.23               | 0.20               |               |
| DBH                 | 0.91               |                     | 0.84                |                     | 0.95               |                     | 0.99               |                    |               |
| Large neighbor DBH  | 0.56               |                     | 0.61                |                     | 0.36               | 0.61                | 0.32               | 0.22               |               |
| Canopy cover        | 0.53               |                     | 0.73                |                     | 0.72               |                     | 0.51               |                    |               |
| Large neighbor myc. | 0.79               |                     | 0.94                |                     | 0.76               |                     | 0.94               |                    |               |
| Leaf area index     | 0.96               |                     | 0.48                |                     | 0.64               |                     | 0.87               |                    |               |
| BA of ECM trees     | 0.73               |                     | 0.66                |                     | 0.43               |                     | 0.34               | 0.16               |               |
| BA of AM trees      | 0.37               | 0.58                | 0.88                |                     | 0.65               |                     | 0.42               | 0.40               |               |

Table S4. ANOVA results testing the effect of watershed (WS), plot-center maple species (M) and their interaction (WS×M) for 22 individual herb-layer species found at the Fernow Experimental Forest, West Virginia, USA. The Benjamini-Hochberg method was applied to account for the familywise error rate. ANOVA P-values smaller than the Benjamini-Hochberg critical value (BH FDR.1) (in bold font) indicate that the discoveries are not false-positives (based on an assumed false discovery rate (FDR) of 0.1). Results are truncated at ANOVA P-values <0.1.

| Species             | Effect | NumDF | DenDF | FValue | ProbF         | Rank | BH FDR.1 |
|---------------------|--------|-------|-------|--------|---------------|------|----------|
| <b>WS3 vs WS7</b>   |        |       |       |        |               |      |          |
| Violets             | WS     | 1     | 24    | 32.48  | <b>0.0001</b> | 1    | 0.001818 |
| New York fern       | WS×M   | 1     | 5     | 33.74  | <b>0.0021</b> | 2    | 0.003636 |
| Jack-in-the-pulpit  | WS     | 1     | 5     | 25.85  | <b>0.0038</b> | 3    | 0.005455 |
| Sweet birch         | WS     | 1     | 4     | 16.62  | 0.0151        | 4    | 0.007273 |
| Yellow fairybells   | WS     | 1     | 11    | 7.62   | 0.0185        | 5    | 0.009091 |
| Yellow fairybells   | M      | 1     | 11    | 7.26   | 0.0209        | 6    | 0.010909 |
| Red Maple           | M      | 1     | 25    | 5.63   | 0.0257        | 7    | 0.012727 |
| Star chickweed      | WS     | 1     | 18    | 5.55   | 0.03          | 8    | 0.014545 |
| Sweet birch         | M      | 1     | 4     | 6.45   | 0.064         | 9    | 0.016364 |
| New York fern       | WS     | 1     | 5     | 5.61   | 0.0641        | 10   | 0.018182 |
| Blackberry          | WS     | 1     | 29    | 3.6    | 0.0676        | 11   | 0.02     |
| Violets             | WS×M   | 1     | 24    | 3.42   | 0.0769        | 12   | 0.021818 |
| White ash           | WS     | 1     | 3     | 5.76   | 0.0959        | 13   | 0.023636 |
| <b>WS7 vs WS13</b>  |        |       |       |        |               |      |          |
| Red maple           | M      | 1     | 27    | 16.73  | <b>0.0003</b> | 1    | 0.001724 |
| Yellow fairybells   | WS     | 1     | 20    | 8.7    | 0.0079        | 2    | 0.003448 |
| star chickweed      | WS     | 1     | 19    | 8.52   | 0.0088        | 3    | 0.005172 |
| New York fern       | WS×M   | 1     | 6     | 13.29  | 0.0108        | 4    | 0.006897 |
| Yellow fairybells   | M      | 1     | 20    | 6.94   | 0.0159        | 5    | 0.008621 |
| Jack-in-the-pulpit  | WS     | 1     | 5     | 8.27   | 0.0347        | 6    | 0.010345 |
| Red oak             | WS     | 1     | 10    | 5.77   | 0.0372        | 7    | 0.012069 |
| <b>WS10 vs WS13</b> |        |       |       |        |               |      |          |
| Red maple           | M      | 1     | 30    | 16.28  | <b>0.0003</b> | 1    | 0.001852 |
| Red oak             | WS     | 1     | 20    | 5.57   | 0.0285        | 2    | 0.003704 |
| Tulip-poplar        | WS×M   | 1     | 8     | 4.45   | 0.0678        | 3    | 0.005556 |

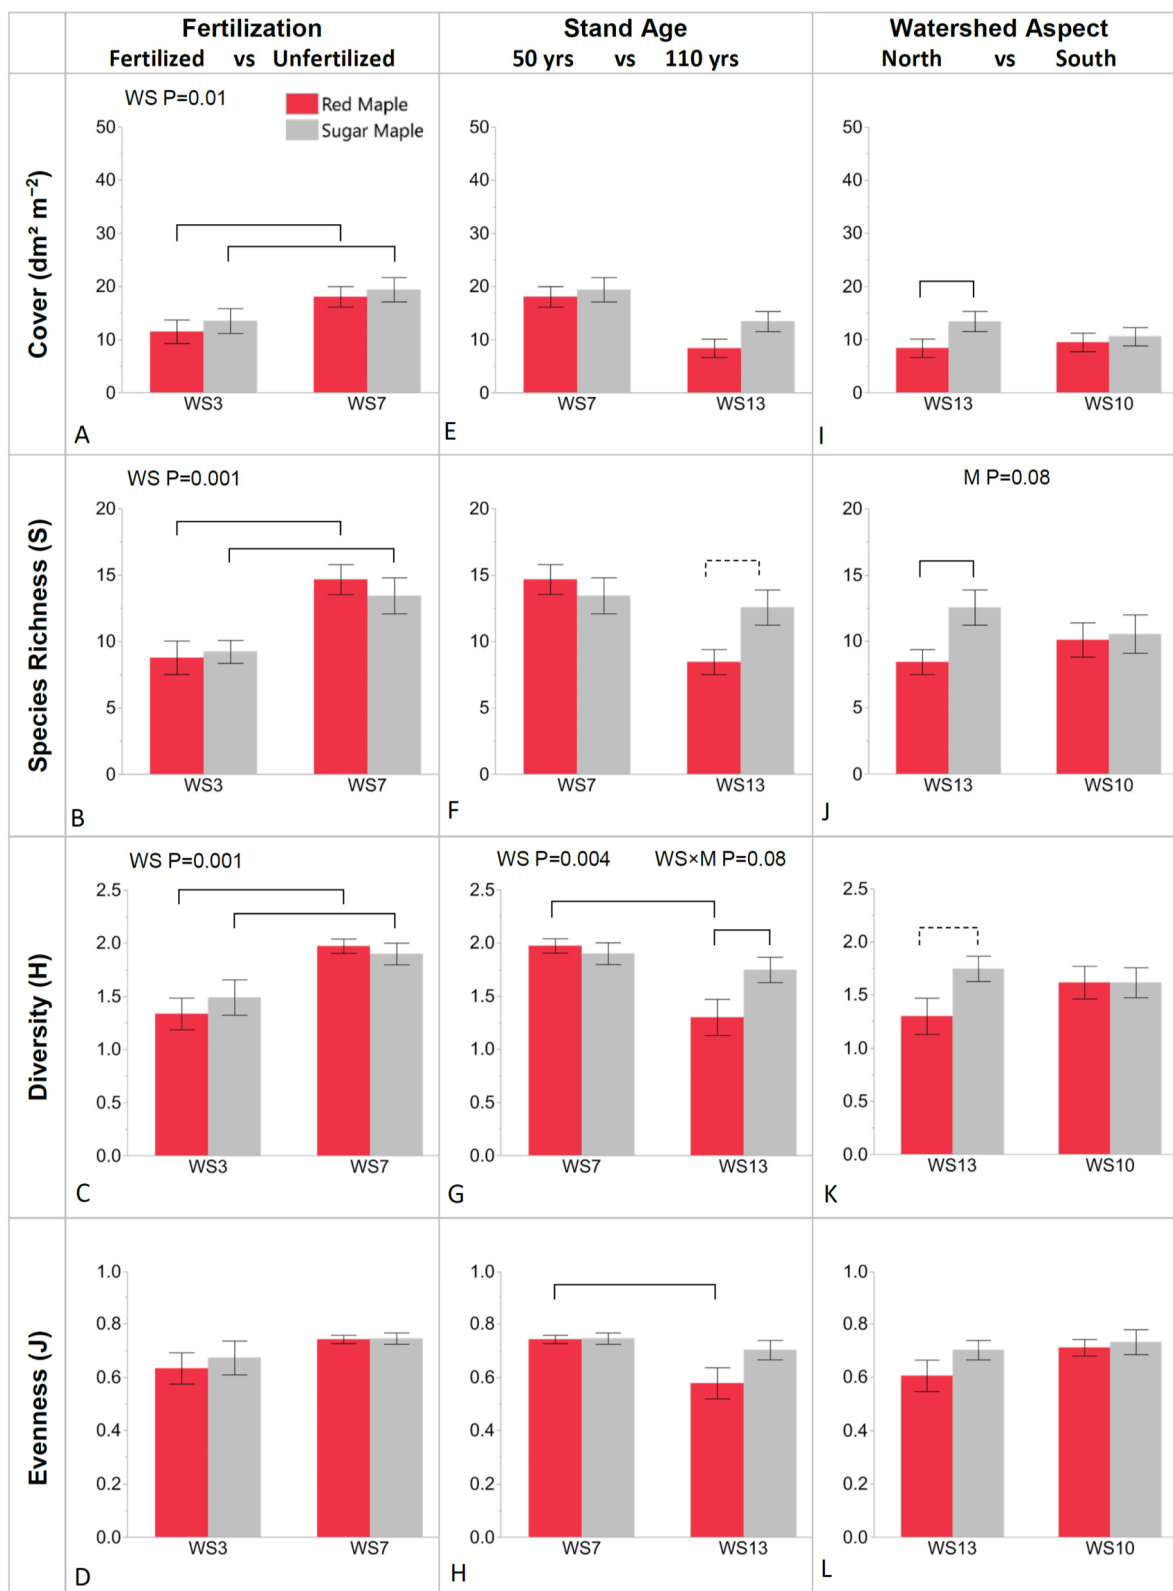

Figure S1. Spring 2019 plot-level herb-layer indices in red maple and sugar maple (M) plots in each of the studied watersheds (WS) at the Fernow Experimental Forest, West Virginia, USA.
